# Supplementary material for: Electrochemical Sensing of Dopamine Using Polypyrrole/Molybdenum Oxide Bilayer-Modified ITO Electrode
Source: MDPI journal article supplement (doi:10.3390/bios13060578), 2023-05-26
Supplement: s1 [file s1]

# Electrochemical sensing of dopamine using polypyrrole/Molybdenum Oxide modified ITO electrode

Nadiyah Alahmadi <sup>1</sup> and Waleed Ahmed El-Said <sup>1,2 \*</sup>

<sup>1</sup> Department of Chemistry, College of Science, University of Jeddah, Jeddah 21959, Saudi Arabia

<sup>2</sup> Chemistry Department, Faculty of Science, Assiut University, Assiut 71516, Egypt

\* Correspondence: awaleedahmed@yahoo.com

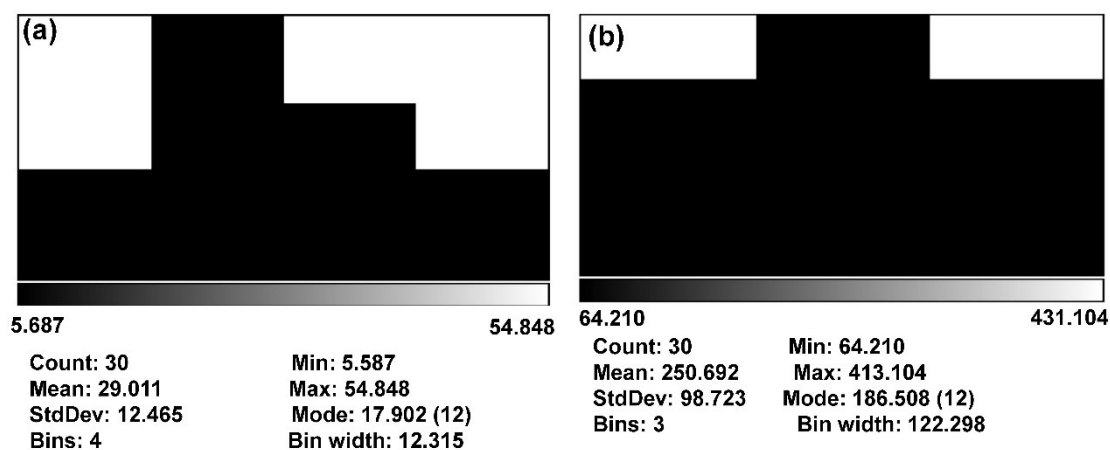

Figure S1. Distribution of the particle sizes of (a) MoO<sub>3</sub> NPs/ITO, and (b) PPy/MoO<sub>3</sub> NPs/ITO.
